# Supplementary material for: Using community science to advance grizzly bear conservation
Source: Atypon-hosted journal article supplement (doi:10.1139/facets-2023-0020), 2024-01-01
Supplement: facets-2023-0020suppla.pdf [file facets-2023-0020suppla.pdf]

# Demographics

\* Required

1. Q1: Do you live in: \*

*Mark only one oval.*

- Alberta
- British Columbia
- Other: \_\_\_\_\_

2. Q2: Which gender do you identify with? \*

*Mark only one oval.*

- He/Him
- She/Her
- They/Them
- Prefer not to say

3. Q3: What is your age category? \*

*Mark only one oval.*

- Under 18
- 18-24
- 25-34
- 35-44
- 45-54
- 55-64
- 65+

4. Q4: What is your level of education? \*

*Mark only one oval.*

- Some high school
- High school
- Technical / trades / vocational
- College / university
- Advanced university (Masters, PhD)
- Other: \_\_\_\_\_

5. Q5: What best describes where you live? \*

*Mark only one oval.*

- Urban
- Suburban
- Rural
- Other: \_\_\_\_\_

6. Q6: What describes your field of work at the time of using the GrizzTracker app? \*

*Mark only one oval.*

- Government of Alberta
- Non-government organization
- Industry: forestry, petroleum
- Agriculture
- Other: \_\_\_\_\_

Application and Program Assessment

7. Q7: What year did you sign up for the GrizzTracker app? \*

*Mark only one oval.*

- 2016
- 2017
- 2018
- 2019
- 2020
- I don't know

8. Q8: How did you hear about the GrizzTracker app? \*

*Mark only one oval.*

- My employer
- Colleague
- Friend
- GrizzTracker Website
- Social Media
- Other: \_\_\_\_\_

9. Q9: Since downloading, how often have you used the GrizzTracker app? \*

*Mark only one oval.*

- Once
- A couple times
- Five or more times
- More than ten times
- Never

10. Q10: When you use the app is it during: \*

*Mark only one oval.*

- Work
- Recreation
- Both during work and when I am recreating

11. Q11: When you use the app, do you generally use it for the duration of your trip within bear country, or just when you observe a bear / bear sign? \*

*Mark only one oval.*

- I open the app at the beginning of every trip in bear country
- I only log into the app when i have observed bear sign
- I totally forget to use the app

12. Q12: If you stopped using the app, what was the main reason?

---

13. Q13: How user-friendly is the GrizzTracker app? \*

Mark only one oval.

Very difficult to use

1

2

3

4

5

Very easy to use

14. Q14: What are some improvements you would suggest for the app? If none, please indicate. \*

---

---

---

---

---

15. Q15: Have you participated in any other type of application aimed at collecting data on animals? Select all that apply. \*

*Check all that apply.*

- iNaturalist
- eBird
- NatureLynx
- Proghorn Xing
- Friends of Earth Canada
- Other: \_\_\_\_\_

16. Q16: Have you visited the GrizzTracker website? \*

*Mark only one oval.*

- Yes
- No

17. Q17: If you have visited the GrizzTracker website, select all that apply:

*Check all that apply.*

- Entered observation using the mapping tool
- To learn more about the GrizzTracker program
- Used resources on Teachers Corner
- Viewed the Gallery
- Other: \_\_\_\_\_

18. Q18: What motivated you to participate in GrizzTracker? Select your top three answers. \*

*Check all that apply.*

- Personal interest in grizzly bears
- Interest in contributing to grizzly bear science
- Interest in contributing to wildlife science broadly
- Obligated because of work
- Desire to learn something new
- Desire to volunteer for wildlife purposes
- Other: \_\_\_\_\_

19. Q19: Please tell us what your expectations were for participating in GrizzTracker (select all that apply). \*

*Check all that apply.*

- Learn about bears generally
- Improve my bear ID skills
- Improve my use of app-based technology
- Learn where grizzly bears are in the Bear Management Areas
- Contribute to grizzly bear science
- Contribute to land management
- Contribute to safety information
- Be involved in something meaningful to me
- Hope to develop skills for a job in wildlife
- Other: \_\_\_\_\_

20. Q20: Please briefly explain if the GrizzTracker Program met your expectations. \*

\_\_\_\_\_

21. Q21: Do you feel your bear identification skills have improved while participating in \*  
GrizzTracker?

*Mark only one oval.*

Yes

No

Maybe

22. Q22: How confident are you in correctly identifying a grizzly bear versus a black \*  
bear?

*Mark only one oval.*

not confident

1

2

3

4

5

very confident



23. Q23: Do you feel your knowledge about grizzly bears has improved by participating in GrizzTracker? \*

*Mark only one oval.*

- Yes  
 No  
 Unsure

24. Q24: Have you talked about GrizzTracker with friends, family, neighbours or colleagues? \*

*Mark only one oval.*

- Yes  
 No

25. Q25: If you answered yes to the previous question, what did you share with them about GrizzTracker?

---

---

---

---

---

26. Q26: Have you recruited others to join the program? \*

*Mark only one oval.*

- Yes  
 No

27. Q27: If you answered yes to the above, why?

---

---

---

---

---

28. Q28: Are you a member of a naturalist or wildlife related club/organization? (i.e. Ducks Unlimited, Alberta Conservation Association, Alberta Fish and Game, Birds Canada ect.)

*Mark only one oval.*

Yes

No

---

This content is neither created nor endorsed by Google.

Google Forms
